# Supplementary material
Source: PubMed Central journal article supplement (PMC1523317)
Supplement: pnas_0509937103_1.pdf [file pnas_0509937103_1.pdf]

**Table 2. Characteristics of patients whose nonfailing or failing hearts were studied *ex vivo*, stratified by serotype**

|                          | Arg nonfailing         | Gly nonfailing         | Arg failing    | Gly failing    |
|--------------------------|------------------------|------------------------|----------------|----------------|
| <i>n</i>                 | 11                     | 11                     | 17             | 14             |
| Age, yr                  | 39 ± 16                | 43 ± 20                | 50 ± 15        | 50 ± 8         |
| Male ( <i>n</i> )        | 3                      | 5                      | 14             | 12             |
| Ethnicity                | 9 White                | 10 White               | 15 White       | 10 White       |
|                          | 1 Hispanic             | 1 Hispanic             | 1 Hispanic     | 2 Black        |
|                          | 1 Asian                |                        | 1 Asian        | 1 Hispanic     |
|                          |                        |                        |                | 1 Asian        |
| Inotropic                | 64% Yes (all dopamine) | 64% Yes (all dopamine) | 47% Yes        | 57% Yes        |
| Agent                    | 27% No                 | 27% No                 | 75% Dobutamine | 50% Dobutamine |
|                          | 9% Unknown             |                        | 38% Dopamine   | 38% Dopamine   |
|                          |                        |                        | 38% Enoximone  | 38% Enoximone  |
|                          |                        |                        | (p.o.)         | (p.o.)         |
|                          |                        |                        | 53% No         | 12% Milrinone  |
|                          |                        |                        |                | 43% No         |
| LVEF                     | 0.59 ± 0.12            | 0.56 ± 0.16            | 0.21 ± 0.09    | 0.16 ± 0.07    |
| Etiology<br>(% ischemic) | N/A                    | N/A                    | 41             | 36             |
| Genotype                 | 100% Arg hmz           | 91% Het                | 100% Arg Hmz   | 86% Het        |
|                          |                        | 9% Hmz                 |                | 14% Hmz        |

Het, heterozygous; Hmz, homozygous; LVEF, left ventricular ejection fraction; N/A, not applicable.
