# Supplementary material
Source: PubMed Central journal article supplement (PMC1523317)
Supplement: pnas_0509937103_2.pdf [file pnas_0509937103_2.pdf]

**Table 3. Characteristics of patients whose failing hearts were studied *ex vivo*, stratified by genotype**

|                          | Arg failing          | Gly failing         |
|--------------------------|----------------------|---------------------|
| <i>n</i>                 | 13                   | 10                  |
| Age, y                   | 52 ± 12              | 51 ± 9              |
| Male ( <i>n</i> )        | 10                   | 9                   |
| Ethnicity                | 11 White             | 7 White             |
|                          | 1 Hispanic           | 1 Black             |
|                          | 1 Asian              | 1 Hispanic          |
|                          |                      | 1 Asian             |
| Inotropic                | 46% Yes              | 50% Yes             |
| Agent                    | 71% Dobutamine       | 60% Dobutamine      |
|                          | 29% Dopamine         |                     |
|                          | 14% Enoximone (p.o.) | 40% Dopamine        |
|                          |                      | 40% Enoximone (p.o) |
|                          | 54% No               | 20% Milrinone       |
|                          |                      | 50% No              |
| LVEF                     | 0.19 ± 0.08          | 0.16 ± 0.08         |
| Etiology<br>(% ischemic) | 46                   | 50                  |
| Genotype                 | 100% Arg Hmz         | 80 % Het            |
|                          |                      | 20 % Hmz            |

Het, heterozygous; Hmz, homozygous.
