# Supplementary material
Source: PubMed Central journal article supplement (PMC1523317)
Supplement: pnas_0509937103_3.pdf [file pnas_0509937103_3.pdf]

**Table 4. Characteristics of the heart failure cohort stratified by treatment and genotype**

|                                | Placebo group ( <i>n</i> = 525) |                                  |                             |                                  | Bucindolol group ( <i>n</i> = 515) |                                  |                             |                                  |
|--------------------------------|---------------------------------|----------------------------------|-----------------------------|----------------------------------|------------------------------------|----------------------------------|-----------------------------|----------------------------------|
|                                | Arg Hmz<br>( <i>n</i> = 236)    | Arg/Gly Het<br>( <i>n</i> = 237) | Gly Hmz<br>( <i>n</i> = 52) | Gly carrier ( <i>n</i><br>= 289) | Arg Hmz<br>( <i>n</i> = 257)       | Arg/Gly Het<br>( <i>n</i> = 216) | Gly Hmz<br>( <i>n</i> = 42) | Gly carrier ( <i>n</i> =<br>258) |
| Age                            | 60 ± 11                         | 60 ± 12                          | 59 ± 13                     | 60 ± 12.5                        | 59 ± 11                            | 61 ± 12                          | 56 ± 14                     | 60 ± 12                          |
| Sex <i>n</i> (%)               |                                 |                                  |                             |                                  |                                    |                                  |                             |                                  |
| Male <i>n</i> (%)              | 187 (79)                        | 183 (77)                         | 42 (81)                     | 225 (78)                         | 206 (80)                           | 173 (8)                          | 34 (81)                     | 207 (80)                         |
| Female <i>n</i> (%)            | 49 (21)                         | 54 (23)                          | 10 (19)                     | 64 (22)                          | 51 (20)                            | 43 (20)                          | 8 (19)                      | 51 (20)                          |
| Race <i>n</i> (%)              |                                 |                                  |                             |                                  |                                    |                                  |                             |                                  |
| Nonblack                       | 212 (90)                        | 182 (77)                         | 33 (63)                     | 215 (74)                         | 215 (84)                           | 165 (76)                         | 26 (62)                     | 191 (74)                         |
| Black                          | 24 (10)                         | 55 (23)                          | 19 (37)                     | 74 (26)                          | 42 (16)                            | 51 (24)                          | 16 (38)                     | 67 (26)                          |
| Etiology <i>n</i> (%)          |                                 |                                  |                             |                                  |                                    |                                  |                             |                                  |
| Ischemic                       | 145 (61)                        | 137 (58)                         | 34 (65)                     | 171 (59)                         | 138 (54)                           | 129 (60)                         | 23 (55)                     | 152 (59)                         |
| Nonischemic                    | 91 (39)                         | 100 (42)                         | 18 (35)                     | 118 (41)                         | 119 (46)                           | 87 (40)                          | 19 (45)                     | 106 (41)                         |
| NYHA <i>n</i> (%)              |                                 |                                  |                             |                                  |                                    |                                  |                             |                                  |
| III                            | 223 (94)                        | 217 (92)                         | 48 (92)                     | 265 (92)                         | 242 (94)                           | 194 (90)                         | 36 (86)                     | 230 (89)                         |
| IV                             | 13 (6)                          | 20 (8)                           | 4 (8)                       | 24 (8)                           | 15 (6)                             | 22 (10)                          | 6 (14)                      | 28 (11)                          |
| LVEF, %                        | 2 ± 7                           | 24 ± 7                           | 23 ± 6                      | 24 ± 7                           | 23 ± 7                             | 23 ± 7                           | 22 ± 6                      | 23 ± 7                           |
| LVEF change*                   | 3.9 ± 7                         | 2.0 ± 6                          | 4.1 ± 8                     | 3.1 ± 9                          | 8.0 ± 10                           | 6.2 ± 8                          | 5.7 ± 8                     | 6.9 ± 9                          |
| RVEF, %                        | 37 ± 13.6                       | 35 ± 12.9                        | 33 ± 11.1                   | 34 ± 12.6                        | 37 ± 12.7                          | 34 ± 13.7                        | 34 ± 13.5                   | 33.9 ± 13.6                      |
| RVEF change*                   | 0.7 ± 12                        | 2.3 ± 12                         | 7.7 ± 15                    | 33 ± 13                          | 4.0 ± 13                           | 7.8 ± 12                         | 4.8 ± 10                    | 7.4 ± 12                         |
| Baseline HR, bpm               | 79 ± 13                         | 81 ± 12                          | 80 ± 12                     | 81 ± 12                          | 82 ± 12                            | 81 ± 12                          | 82 ± 14                     | 82 ± 13                          |
| HR change, bpm*                | -1.3 ± 14                       | -1.5 ± 13                        | -5.5 ± 14                   | -2.2 ± 13                        | -8.3 ± 14                          | -11 ± 13                         | -8.0 ± 12                   | -10.1 ± 13                       |
| Systolic BP, mmHg              | 118 ± 18                        | 114 ± 17                         | 121 ± 17                    | 117 ± 17                         | 117 ± 17                           | 119 ± 19                         | 123 ± 15                    | 120 ± 18                         |
| Systolic BP change,* mmHg      | -0.5 ± 18                       | 0.8 ± 17                         | 4.4 ± 17                    | 1.5 ± 17                         | -0.6 ± 18                          | 2.6 ± 18                         | -2.6 ± 17                   | 1.8 ± 18                         |
| Mean arterial pressure, mmHg   | 87 ± 12                         | 86 ± 11                          | 89 ± 10                     | 87 ± 11                          | 87 ± 12                            | 87 ± 12                          | 92 ± 11                     | 88 ± 12                          |
| BMI, kg/m <sup>2</sup>         | 27 ± 5                          | 28 ± 6                           | 29 ± 5                      | 28 ± 6                           | 28 ± 5                             | 27 ± 5                           | 29 ± 6                      | 27 ± 5                           |
| CHF duration, mos, median)     | 32                              | 27                               | 39                          | 31                               | 30                                 | 32                               | 36                          | 34                               |
| Current cigarette smoker, %    | 17                              | 17                               | 10                          | 16                               | 17                                 | 21                               | 12                          | 19                               |
| History of diabetes, %         | 35                              | 32                               | 33                          | 32                               | 37                                 | 38                               | 26                          | 36                               |
| History of hypertension, %     | 50                              | 56                               | 65                          | 58                               | 54                                 | 61                               | 62                          | 61                               |
| Current atrial fibrillation, % | 13                              | 11                               | 12                          | 11                               | 9                                  | 11                               | 5                           | 10                               |
| LBBB, %                        | 25                              | 22                               | 21                          | 22                               | 27                                 | 24                               | 21                          | 24                               |
| BUN, mg/dl                     | 24 ± 14                         | 23 ± 11                          | 26 ± 18                     | 23 ± 13                          | 23 ± 13                            | 25 ± 14                          | 22 ± 11                     | 24 ± 14                          |
| Creatinine, mg/dl              | 1.2 ± 0.4                       | 1.2 ± 0.4                        | 1.3 ± 0.4                   | 1.2 ± 0.4                        | 1.2 ± 0.4                          | 1.2 ± 0.4                        | 1.2 ± 0.5                   | 1.2 ± 0.4                        |

|                                    | Placebo group (n = 525) |                          |                     |                          | Bucindolol group (n = 515) |                          |                     |                          |
|------------------------------------|-------------------------|--------------------------|---------------------|--------------------------|----------------------------|--------------------------|---------------------|--------------------------|
|                                    | Arg Hmz<br>(n = 236)    | Arg/Gly Het<br>(n = 237) | Gly Hmz<br>(n = 52) | Gly carrier (n<br>= 289) | Arg Hmz<br>(n = 257)       | Arg/Gly Het<br>(n = 216) | Gly Hmz<br>(n = 42) | Gly carrier (n =<br>258) |
| BUN/creatinine                     | 20 ± 7                  | 18 ± 7                   | 19 ± 7              | 19 ± 17                  | 19 ± 17                    | 20 ± 9                   | 17 ± 4              | 20 ± 8                   |
| BUN/creatinine change <sup>†</sup> | 0.6 ± 6.2               | 0.9 ± 6.7                | 0.9 ± 4.4           | 0.9 ± 6.3                | 0.3 ± 6.0                  | -0.3 ± 6.2               | 1.2 ± 3.6           | 0.0 ± 5.9                |
| PNE (median)                       | 391                     | 425                      | 417                 | 424                      | 423                        | 475                      | 424                 | 426                      |
| PNE change <sup>†</sup>            | 6 ± 268                 | 25 ± 304                 | 52 ± 251            | 30 ± 294                 | -67 ± 272                  | -69 ± 2.65               | -79 ± 453           | -70 ± 302                |
| Cardiac medications, %             |                         |                          |                     |                          |                            |                          |                     |                          |
| ACE inhibitor                      | 92                      | 94                       | 85                  | 92                       | 89                         | 92                       | 93                  | 92                       |
| Digoxin                            | 89                      | 92                       | 90                  | 91                       | 92                         | 88                       | 86                  | 87                       |
| Diuretic                           | 92                      | 93                       | 94                  | 93                       | 93                         | 94                       | 98                  | 95                       |
| Hydralazine/isosorbic dinitrate    | 31                      | 34                       | 25                  | 32                       | 27                         | 32                       | 26                  | 31                       |
| Aspirin                            | 43                      | 51                       | 38                  | 48                       | 45                         | 46                       | 33                  | 44                       |
| Statin                             | 25                      | 26                       | 40                  | 28                       | 26                         | 30                       | 31                  | 30                       |

| Cause of death <i>n</i> (%)         | Placebo ( <i>n</i> = 525)    |                          |                             |                                  | Bucindolol ( <i>n</i> = 515) |                          |                             |                                  |
|-------------------------------------|------------------------------|--------------------------|-----------------------------|----------------------------------|------------------------------|--------------------------|-----------------------------|----------------------------------|
|                                     | Arg Hmz<br>( <i>n</i> = 236) | Het<br>( <i>n</i> = 237) | Gly Hmz<br>( <i>n</i> = 52) | Gly carrier<br>( <i>n</i> = 289) | Arg Hmz<br>( <i>n</i> = 257) | Het<br>( <i>n</i> = 216) | Gly Hmz<br>( <i>n</i> = 42) | Gly carrier<br>( <i>n</i> = 258) |
| SD w/o preceding HF Sx <i>n</i> (%) | 15 (6.4)                     | 15 (6.3)                 | 7 (13.5)                    | 22 (7.6)                         | 13 (5.1)                     | 11 (5.1)                 | 2 (4.8)                     | 13 (5.0)                         |
| SD preceded by HF Sx <i>n</i> (%)   | 5 (2.1)                      | 4 (1.7)                  | 0 (0)                       | 4 (1.45)                         | 3 (1.2)                      | 7 (3.2)                  | 1 (2.4)                     | 8 (3.1)                          |
| Pump failure <i>n</i> (%)           | 13 (5.5)                     | 19 (8.0)                 | 6 (11.5)                    | 25 (8.7)                         | 7 (2.7)                      | 10 (4.6)                 | 1 (2.4)                     | 11 (4.3)                         |
| All HF-related (2 + 3) <i>n</i> (%) | 18 (7.6)                     | 23 (9.7)                 | 6 (11.5)                    | 29 (10.0)                        | 10 (3.9)                     | 17 (7.9)                 | 2 (4.8)                     | 19 (7.4)                         |
| Myocardial infarction <i>n</i> (%)  | 1 (0.4)                      | 3 (1.3)                  | 0 (0)                       | 3 (1.0)                          | 2 (0.8)                      | 1 (0.5)                  | 0 (0)                       | 1 (0.4)                          |
| Cardiac procedure                   | 1                            | 1                        | 0                           | 1                                | 0                            | 0                        | 1                           | 1                                |
| Other CV <i>n</i> (%)               | 5 (2.1)                      | 2 (0.8)                  | 0 (0)                       | 2 (0.7)                          | 1 (0.4)                      | 5 (2.3)                  | 1 (2.4)                     | 6 (2.3)                          |
| Non-CV <i>n</i> (%)                 | 4 (1.7)                      | 1 (0.4)                  | 2 (3.8)                     | 3 (1.0)                          | 5 (1.9)                      | 8 (3.7)                  | 1 (2.4)                     | 9 (3.5)                          |
| No information <i>n</i> (%)         | 3 (1.3)                      | 1 (0.4)                  | 0 (0)                       | 1 (0.3)                          | 4 (1.6)                      | 1 (0.5)                  | 0 (0)                       | 1 (0.4)                          |
| All deaths <i>n</i> (%)             | 47 (19.9)                    | 46 (19.4)                | 15 (28.8)                   | 61 (21.1)                        | 35 (13.6)                    | 43 (19.9)                | 7 (16.7)                    | 50 (19.4)                        |
| No death                            | 189                          | 191                      | 37                          | 228                              | 222                          | 173                      | 35                          | 208                              |

Unless otherwise noted, data are mean  $\pm$  SD. BMI, body mass index; BP, blood pressure; BUN, blood urea nitrogen; Het, heterozygous; Hmz, homozygous; HR, heart rate; LBBB, left bundle branch block; LVEF, left ventricular ejection fraction; NYHA, New York Heart Association class; PNE, peripheral norepinephrine; RVEF, right ventricular ejection fraction; HF, heart failure; Sx, symptoms; SD, sudden death; CV, cardiovascular; w/o without.

\*Change at 12 months.

†Change at 3 months.
